# Supplementary material for: Graphene-containing metal–organic framework nanocomposites for enhanced microwave ablation of salivary adenoid cystic carcinoma
Source: Royal Society of Chemistry journal article supplement (doi:10.1039/d1na00729g), 2022-01-01
Supplement: d1na00729g1.pdf [file d1na00729g1.pdf]

## **Graphene-Embedded Metal-Organic Framework Nanocomposites for Enhanced Microwave Ablation of Salivary Adenoid Cystic Carcinoma**

Ruozhen Li,<sup>ab</sup> Yaping Tian,<sup>c</sup> Biao Zhu,<sup>b</sup> Yu Wang,<sup>d</sup> Ruijie Dang,<sup>b</sup> Lisheng Zhao,<sup>b</sup> Suo Yang,<sup>b</sup> Yunxia Li <sup>b</sup> and Ning Wen <sup>\*b</sup>

*<sup>a</sup> Medical School of Chinese PLA, Beijing 100853, China.*

*<sup>b</sup> Department of Stomatology, The First Medical Center, Chinese PLA General Hospital, No.28 Fuxing Road, Beijing 100853, China.*

*<sup>c</sup> Birth defects prevention and Control Technology Research Center, Translational Medicine Research Center, Chinese PLA General Hospital, 28 Fu-Xing Road, Beijing. 100853, China.*

*<sup>d</sup> Department of Oncology, Air Force Medical Center, PLA, No. 30 FuCheng Road, Haidian District, Beijing 100142, China.*

\* Corresponding author.

*E-mail addresses:* wenningchn@163.com (N. Wen).

## Supporting Information

### Supporting Figures

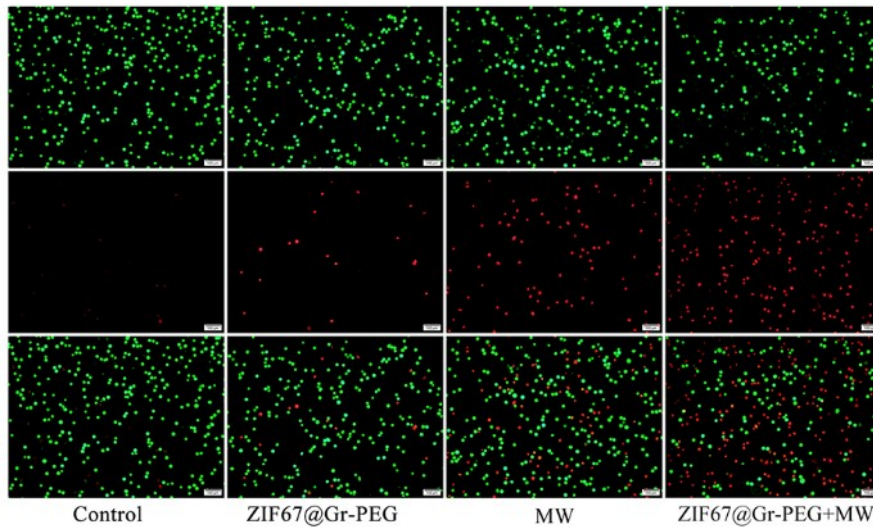

**Fig. S1.** Calcein-AM and propidium iodide (PI) staining results of cells in different groups. MW irradiation was performed for 3 min. Live/dead cells were green/red, respectively.

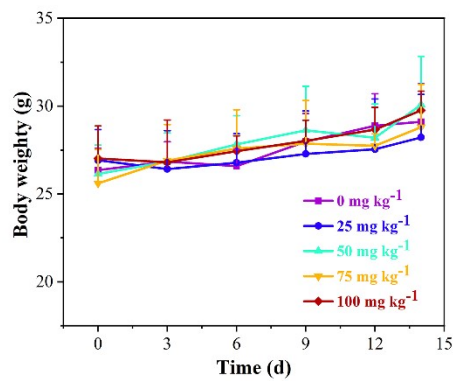

**Fig. S2.** Changes in body weight of the mice within 14 days of acute toxicity test.

A

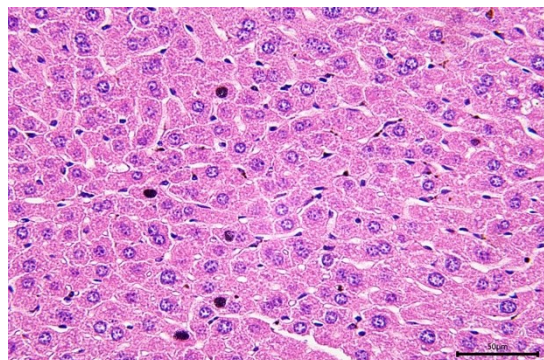

B

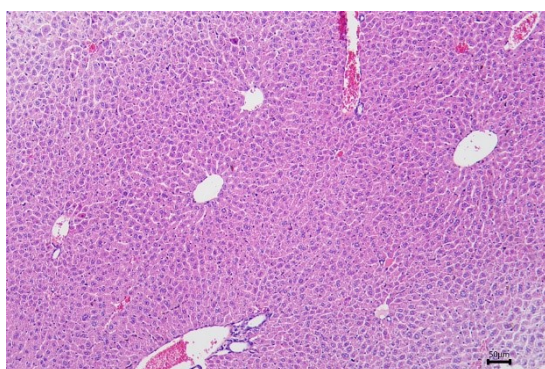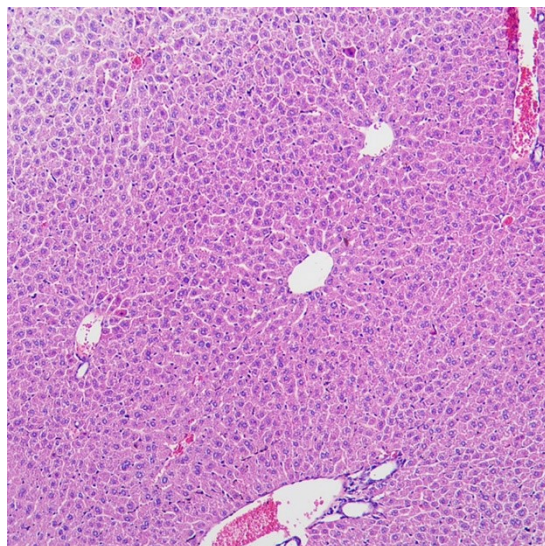

C

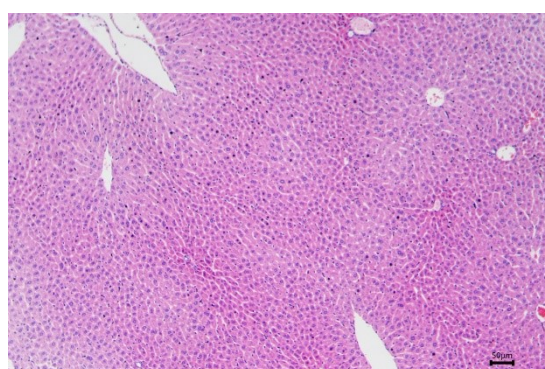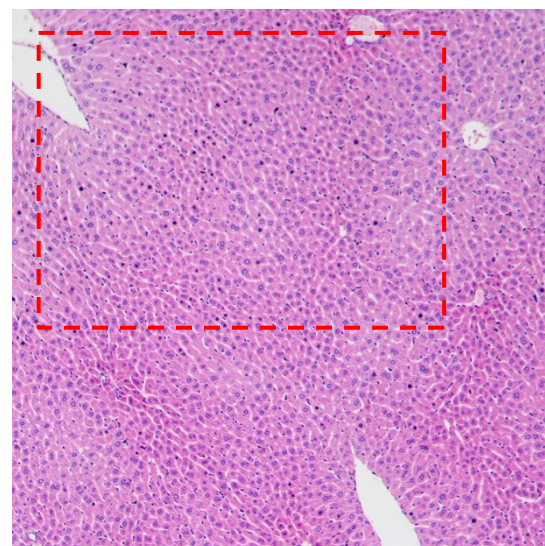

Fig. S3. Morphology of liver tissue of mice treated with ZIF67@Gr-PEG NCs at 75 and 100 mg kg<sup>-1</sup>. (A) In the liver tissue, the nanoparticles can be quickly phagocytosed by a reticuloendothelial system and accumulated in the liver. Some hepatocyte nuclei were deeply stained after capture of circulating ZIF67@Gr-

PEG NCs. Kupffer cells became enlarged and filled with dark brown granules. (B) Few granules appeared in the cytoplasm on the H&E staining of the liver after the mice administrated with ZIF67@Gr-PEG NCs at 75 mg kg<sup>-1</sup>, (C) while a number of dark brown granules were seen in the hepatic tissue after the mice injected with ZIF67@Gr-PEG NCs at 100 mg kg<sup>-1</sup>. H&E staining proved that ZIF67@Gr-PEG NCs at the concentration of 100 mg kg<sup>-1</sup> were enriched in hepatocytes and Kupffer cells and showed a lower biological toxicity in vivo.
